# Supplementary material for: Toward personalizing treatment for depression: predicting diagnosis and severity
Source: PubMed Central journal article supplement (PMC4215055; doi:10.1136/amiajnl-2014-002733), 2014-07-02
Supplement: amiajnl-2014-002733-s1.pdf [file amiajnl-2014-002733-s1.pdf]

List 1: The 22 clinically relevant ontologies used in our optimized version of the NCBO Annotator.

| Ontology Name                                          | Source | Abbreviation |
|--------------------------------------------------------|--------|--------------|
| Anatomical Therapeutic Chemical Classification System  | WHOCC  | ATC          |
| Current Procedural Terminology                         | UMLS   | CPT          |
| Coding Symbols for Thesaurus of Adverse Reaction Terms | UMLS   | COSTART      |
| US Food and Drug Administration Medical Devices        | -      | -            |
| Healthcare Common Procedure Coding System              | UMLS   | HCPCS        |
| Human Disease Ontology                                 | OBO    | DO           |
| International Classification of Disease (ICD-10)       | UMLS   | ICD10        |
| International Classification of Disease (ICD-9)        | UMLS   | ICD9         |
| Logical Observation Identifier Names and Codes         | UMLS   | LNC          |
| Medical Dictionary for Regulatory Activities           | UMLS   | MDR          |
| MedlinePlus Health Topics<br>MEDLINEPLUS               | UMLS   |              |
| Medical Subject Headings                               | UMLS   | MSH          |
| National Cancer Institute Thesaurus                    | UMLS   | NCI          |
| National Drug File                                     | UMLS   | NDFRT        |
| Online Mendelian Inheritance in Man                    | UMLS   | OMIM         |
| Ontology of Adverse Events                             | OBO    | OAE          |
| RadLex                                                 | NCI    | RADLEX       |
| RxNORM                                                 | UMLS   | RXNORM       |
| Syndromic Surveillance Ontology                        | -      | SSO          |
| Systematized Nomenclature of Medicine-Clinical Terms   | UMLS   | SNOMEDCT     |
| Universal Medical Device Nomenclature System           | UMLS   | UMD          |
| World Health Organization Adverse Reaction Terminology | UMLS   | WHO-ART      |
