# Supplementary material for: Toward personalizing treatment for depression: predicting diagnosis and severity
Source: PubMed Central journal article supplement (PMC4215055; doi:10.1136/amiajnl-2014-002733), 2014-07-02
Supplement: amiajnl-2014-002733-s2.pdf [file amiajnl-2014-002733-s2.pdf]

List 2: Depression disorder terms. Patients in the depression cohort must contain at least one of these terms in their clinical text.

adjustment reaction with brief depressive reaction  
adjustment reaction with prolonged depressive reaction  
agitated depression  
atypical depression  
atypical depressive dis  
brief depressive adjustment reaction  
childhood depression  
chronic depression  
chronic depressive personality disorder  
chronic recurrent major depressive disorder  
depress psychosis-mild  
depress psychosis-severe  
depression  
depression aggravated  
depression agitated  
depression mental  
depression neurotic  
depression nos  
depression postmenopausal  
depression reactive  
depression suicidal  
depression, endogenous  
depression, neurotic  
depression, post-partum  
depression, postpartum  
depression, reactive  
depression, refractory  
depression, unipolar  
depressive dis  
depressive disorder  
depressive disorder nec  
depressive disorder nos  
depressive disorder, major  
depressive disorder, nos  
depressive disorder, not elsewhere classified  
depressive disorders  
depressive episode  
depressive illness  
depressive psychosis-mod  
depressive reaction  
depressive type psychosis  
disorder, depressive  
disorder, dysthymic

disorder, major depressive  
disorder, seasonal affective  
disorders, major depressive  
dysthymia  
dysthymic dis  
dysthymic disorder  
dysthymic disorders  
endogenous depression  
grade 1 depression  
involutional depression  
major depression  
major depression in complete remission  
major depression in partial remission  
major depression in remission  
major depression, single episode  
major depressive disorder  
major depressive disorder, nos  
major depressive disorder, recurrent  
major depressive disorder, recurrent episode  
major depressive disorder, recurrent episode, in full remission  
major depressive disorder, recurrent episode, in partial or unspecified remission  
major depressive disorder, recurrent severe without psychotic features  
major depressive disorder, recurrent, mild  
major depressive disorder, recurrent, moderate  
major depressive disorder, single episode  
major depressive disorder, single episode in full remission  
major depressive disorder, single episode, in partial or unspecified remission  
major depressive disorder, single episode, in partial remission  
major depressive disorder, single episode, mild  
major depressive disorder, single episode, moderate  
major depressive disorder, single episode, unspecified  
major depressive disorders  
major depressive illness  
masked depression  
melancholic depression  
menopausal depression  
mild depression  
mild major depression  
mild postnatal depression  
mild recurrent major depression  
minor depressive disorder  
moderate depression  
moderate major depression  
moderate major depression, single episode  
moderate recurrent major depression  
mood disorder, seasonal

mood disorders, seasonal  
neurotic depression  
post natal depression  
post partum depression  
post stroke depression  
post-natal depression  
post-partum depression  
postmenopausal depression  
postnatal depression  
postoperative depression  
postpartum depression  
prolong depressive react  
prolonged depressive adjustment reaction  
psychotic depression  
reactive depression  
reactive depression (situational)  
reactive depressions  
recurr depr psychos-mild  
recurr depr psychos-mod  
recurrent depression  
recurrent major depression  
recurrent major depression in remission  
recurrent major depressive episode  
recurrent major depressive episodes  
refractory depression  
seasonal affective disorder  
seasonal affective disorders  
seasonal depression  
seasonal mood disorder  
secondary dysthymia  
severe depression  
severe major depression with psychotic features  
severe postnatal depression  
severe recurrent major depression with psychotic features  
single episode of major depression  
single episode of major depressive disorder  
single major depressive episode  
single major depressive episode, moderate  
suicidal depression  
treatment resistant depression  
unipolar depression  
unipolar depressions
