# Supplementary material for: Toward personalizing treatment for depression: predicting diagnosis and severity
Source: PubMed Central journal article supplement (PMC4215055; doi:10.1136/amiajnl-2014-002733), 2014-07-02
Supplement: amiajnl-2014-002733-s3.pdf [file amiajnl-2014-002733-s3.pdf]

List 3: Anti-depressive drug ingredients. Patients in the depression cohort must contain at least one of these terms in their clinical text.

alprazolam  
amitriptyline  
amoxapine  
aripiprazole  
buspirone  
citalopram  
desipramine  
desvenlafaxine  
duloxetine  
escitalopram  
fluoxetine  
imipramine  
isocarboxazid  
lorazepam  
maprotiline  
mirtazapine  
nefazodone  
nortriptyline  
olanzapine  
paroxetine  
phenelzine  
probenecid  
protriptyline  
quetiapine  
sertraline  
tranylcypromine  
trazodone  
trimipramine  
venlafaxine
